# Supplementary material for: Clerodane Furanoditerpenoids from Tinospora bakis (A.Rich.) Miers (Menispermaceae)
Source: MDPI journal article supplement (doi:10.3390/molecules29010154), 2023-12-26
Supplement: s1 [file s1]

# Supplementary data

## Clerodane furanoditerpenoids from *Tinospora bakis* (A.Rich.)

### Miers (Menispermaceae)

Ahmed Saeed Kabbashi <sup>1,2,†</sup>, Maazah Abdul Sattar <sup>1,†</sup>, Muhammad Aamer<sup>1</sup>, Nimra Naz Siddiqui <sup>3</sup>, Muhammad Kamran <sup>1</sup>, Aneela Fayaz <sup>1</sup>, Humera Jahan <sup>3</sup>, Farooq Ahmad Khan <sup>1,4,\*</sup> and Yan Wang <sup>1,\*</sup>

- <sup>1</sup> H. E. J. Research Institute of Chemistry, International Center for Chemical and Biological Sciences, University of Karachi, Karachi 75270, Pakistan; ahmedsak88@gmail.com (A.S.K.); maazahmughal@gmail.com (M.A.S.); m.aamer00786@gmail.com (M.A.); mkchemist785@gmail.com (M.K.); aneelafayaz1993@gmail.com (A.F.).
- <sup>2</sup> Department of Microbiology, Faculty of Pure and Applied Sciences, International University of Africa, Khartoum, Sudan
- <sup>3</sup> Dr. Panjwani Center for Molecular Medicine and Drug Research, International Center for Chemical and Biological Sciences, University of Karachi, Karachi-75270, Pakistan; nazsiddiqui92@gmail.com (N.N.S.), jahan\_pcmed@yahoo.com (H.J.)
- <sup>4</sup> Third World Center (TWC) for Chemical Sciences, International Center for Chemical & Biological Sciences, University of Karachi, Karachi-75270, Pakistan

\* Correspondence: yan.wang@iccs.edu (Y.W.); farooq.khan@iccs.edu (F.-A.K.)

† These authors contributed equally to this work.

## List of Contents

|                                                                                                                 |    |
|-----------------------------------------------------------------------------------------------------------------|----|
| <b>Figure S1.</b> UV spectrum of compound <b>1</b> .....                                                        | 3  |
| <b>Figure S2.</b> IR spectrum of compound <b>1</b> .....                                                        | 4  |
| <b>Figure S3.</b> EI-MS spectrum of compound <b>1</b> .....                                                     | 4  |
| <b>Figure S4.</b> HR-EI-MS spectrum of compound <b>1</b> .....                                                  | 5  |
| <b>Figure S5.</b> CD spectrum of compound <b>1</b> .....                                                        | 5  |
| <b>Figure S6.</b> $^1\text{H}$ NMR spectrum of compound <b>1</b> ( $\text{CD}_3\text{OD}$ , 400 MHz) .....      | 6  |
| <b>Figure S7.</b> $^{13}\text{C}$ NMR spectrum of compound <b>1</b> ( $\text{CD}_3\text{OD}$ , 125 MHz) .....   | 6  |
| <b>Figure S8.</b> DEPT spectrum of compound <b>1</b> .....                                                      | 7  |
| <b>Figure S9.</b> $^1\text{H}$ - $^1\text{H}$ COSY spectrum of compound <b>1</b> .....                          | 7  |
| <b>Figure S10.</b> HSQC spectrum of compound <b>1</b> .....                                                     | 8  |
| <b>Figure S11.</b> HMBC spectrum of compound <b>1</b> .....                                                     | 8  |
| <b>Figure S12.</b> NOESY spectrum of compound <b>1</b> .....                                                    | 9  |
| <b>Figure S13.</b> UV spectrum of compound <b>10</b> .....                                                      | 10 |
| <b>Figure S14.</b> IR spectrum of compound <b>10</b> .....                                                      | 11 |
| <b>Figure S15.</b> CD spectrum of compound <b>10</b> .....                                                      | 12 |
| <b>Figure S16.</b> FAB-MS spectrum of compound <b>10</b> .....                                                  | 13 |
| <b>Figure S17.</b> HR-FAB-MS spectrum of compound <b>10</b> .....                                               | 13 |
| <b>Figure S18.</b> $^1\text{H}$ NMR spectrum of compound <b>10</b> ( $\text{CD}_3\text{OD}$ , 500 MHz) .....    | 14 |
| <b>Figure S19.</b> $^{13}\text{C}$ NMR spectrum of compound <b>10</b> ( $\text{CD}_3\text{OD}$ , 125 MHz) ..... | 14 |
| <b>Figure S20.</b> DEPT spectrum of compound <b>10</b> .....                                                    | 15 |
| <b>Figure S21.</b> $^1\text{H}$ - $^1\text{H}$ COSY spectrum of compound <b>10</b> .....                        | 15 |
| <b>Figure S22.</b> HSQC spectrum of compound <b>10</b> .....                                                    | 16 |
| <b>Figure S23.</b> HMBC spectrum of compound <b>10</b> .....                                                    | 16 |
| <b>Figure S24.</b> NOESY spectrum of compound <b>10</b> .....                                                   | 17 |
| <b>S1.</b> ECD Calculation of compound <b>1</b> .....                                                           | 17 |
| S1.1 Energies at MMFF94 force field .....                                                                       | 17 |
| S1.2 Energies at B3LYP theory level .....                                                                       | 17 |
| S1.3 Coordinates at B3LYP theory level .....                                                                    | 19 |

# THERMO ELECTRON ~ VISIONpro SOFTWARE V4.10

|               |                                      |                |           |
|---------------|--------------------------------------|----------------|-----------|
| Operator Name | STUDENT                              | Date of Report | 7/11/2023 |
| Department    | Analytical Lab Nanotechnology center | Time of Report | 4:27:54PM |
| Organization  | ICCBS, Karachi University            |                |           |
| Information   | MAAZAH/DR .YAN                       |                |           |

## Scan Graph

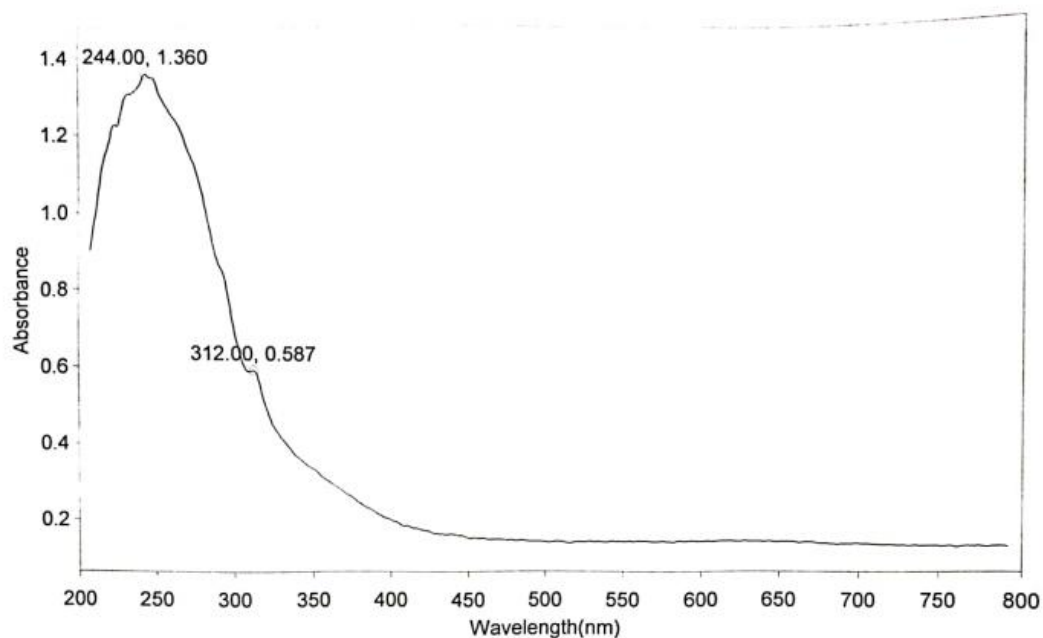

## Results Table - AS13-2-6.sre,AS-13-2-6,Cycle01

|        |       |                              |
|--------|-------|------------------------------|
| nm     | A     | Peak Pick Method             |
| 244.00 | 1.360 | Find 8 Peaks Above -3.0000 A |
| 312.00 | 0.587 | Start Wavelength 200.00 nm   |
|        |       | Stop Wavelength 600.00 nm    |
|        |       | Sort By Wavelength           |

Sensitivity Medium

Figure S1. UV spectrum of compound 1

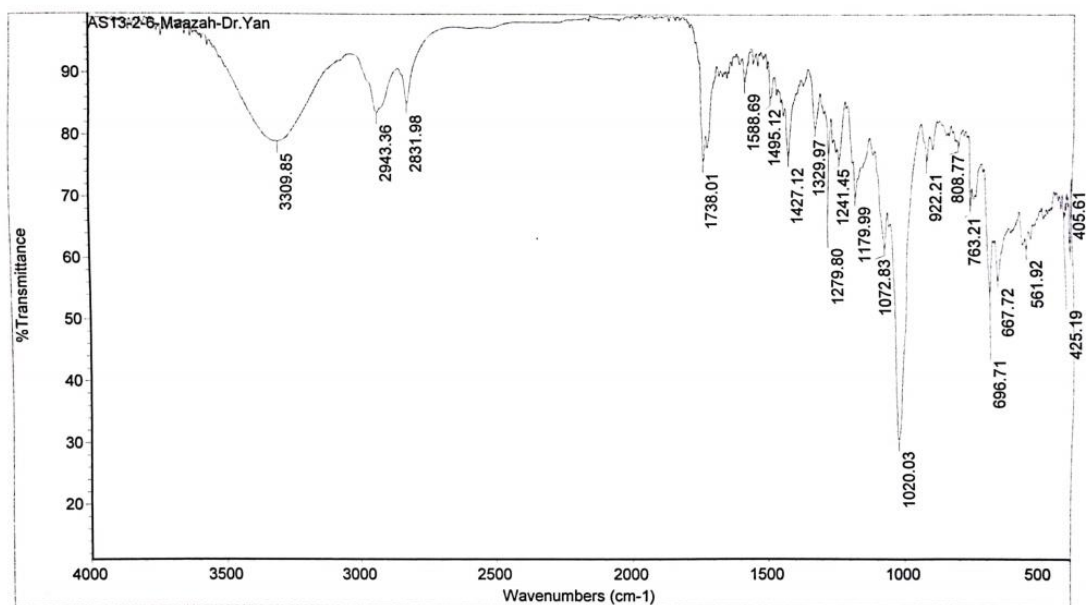

AS13-2-6-Maazah-Dr.Yan

Analyst: zainab

Technique: ATR

Number of sample scans: 16  
Number of background scans: 16  
Resolution: 4.000  
Sample gain: 1.0  
Optical velocity: 0.4747  
Aperture: 150.00

Figure S2. IR spectrum of compound 1

HEJ-ICCBS  
7/7/2023 11:48:13 AM

File: AS-13-2-6 Date Run: 06-12-2020 (Time Run: 12:37:24)  
Sample: AHMED SAEED ALI /DR. YAN WANG  
Instrument: JEOL 600H-1  
Inlet: Direct Probe

Ionization mode: EI+

Run By: MASS LAB-104

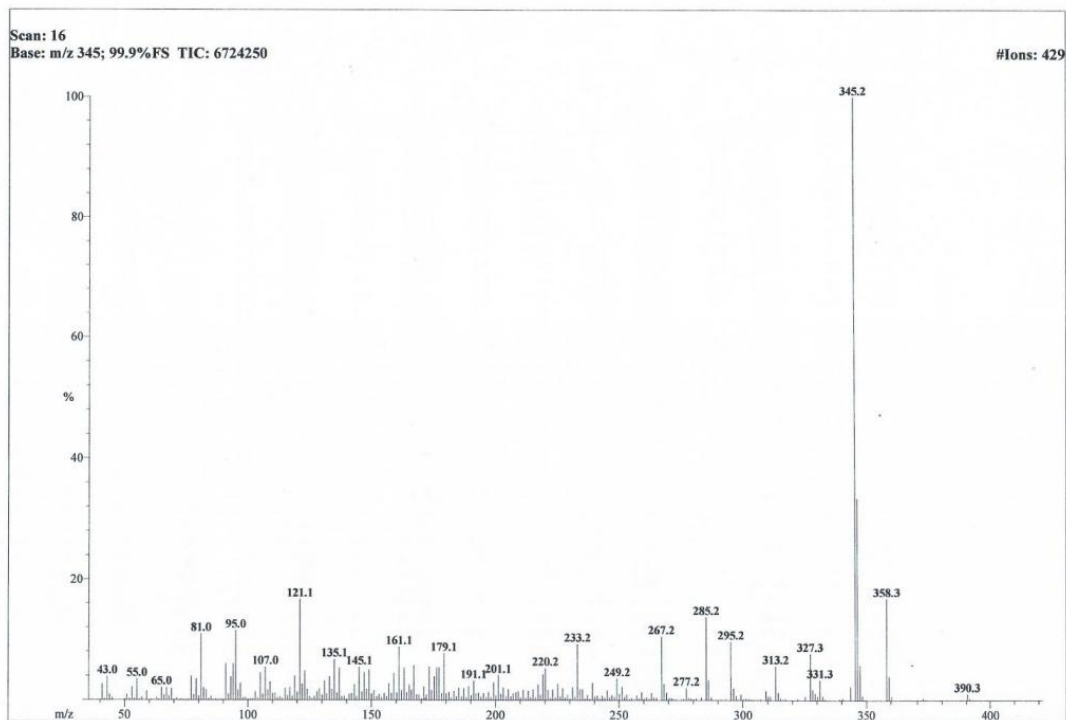

Figure S3. EI-MS spectrum of compound 1

| Mass     | Relative Intensity | Theoretical Mass | Delta [ppm] | Delta [mmu] | RDB  | Composition                                    |
|----------|--------------------|------------------|-------------|-------------|------|------------------------------------------------|
| 345.1727 | 38.3               | 327.1444         | 32.4        | 10.6        | 5.5  | C <sub>16</sub> H <sub>23</sub> O <sub>7</sub> |
|          |                    | 345.1702         | 7.2         | 2.5         | 8.5  | C <sub>20</sub> H <sub>25</sub> O <sub>5</sub> |
|          |                    | 345.1643         | 24.2        | 8.4         | 17.5 | C <sub>27</sub> H <sub>21</sub>                |
|          |                    | 345.1855         | -37.0       | -12.8       | 12.5 | C <sub>24</sub> H <sub>25</sub> O <sub>2</sub> |
| 346.1774 | 8.1                | 346.1780         | -1.9        | -0.7        | 8.0  | C <sub>20</sub> H <sub>26</sub> O <sub>5</sub> |
|          |                    | 346.1722         | 15.1        | 5.2         | 17.0 | C <sub>27</sub> H <sub>22</sub>                |
| 347.1822 | 1.3                | 347.1800         | 6.5         | 2.3         | 16.5 | C <sub>27</sub> H <sub>23</sub>                |
|          |                    | 347.1858         | -10.4       | -3.6        | 7.5  | C <sub>20</sub> H <sub>27</sub> O <sub>5</sub> |
|          |                    | 347.1706         | 33.6        | 11.7        | 3.5  | C <sub>16</sub> H <sub>27</sub> O <sub>3</sub> |
| 358.1418 | 3.9                | 358.1416         | 0.5         | 0.2         | 10.0 | C <sub>20</sub> H <sub>22</sub> O <sub>6</sub> |
|          |                    | 358.1358         | 16.9        | 6.0         | 19.0 | C <sub>27</sub> H <sub>18</sub> O <sub>1</sub> |
| 359.1568 | 1.0                | 359.1495         | 20.3        | 7.3         | 9.5  | C <sub>20</sub> H <sub>23</sub> O <sub>6</sub> |
|          |                    | 359.1647         | -22.1       | -8.0        | 13.5 | C <sub>24</sub> H <sub>23</sub> O <sub>3</sub> |
|          |                    | 359.1436         | 36.7        | 13.2        | 18.5 | C <sub>27</sub> H <sub>19</sub> O <sub>1</sub> |
| 368.9932 | 1.7                | 368.9977         | -12.0       | -4.4        | 28.5 | C <sub>28</sub> H <sub>1</sub> O <sub>2</sub>  |
|          |                    | 368.9883         | 13.5        | 5.0         | 15.5 | C <sub>17</sub> H <sub>5</sub> O <sub>10</sub> |
|          |                    | 369.0035         | -27.9       | -10.3       | 19.5 | C <sub>21</sub> H <sub>5</sub> O <sub>7</sub>  |
| 390.1687 | 2.0                | 390.1679         | 2.3         | 0.9         | 9.0  | C <sub>21</sub> H <sub>26</sub> O <sub>7</sub> |
|          |                    | 390.1620         | 17.3        | 6.8         | 18.0 | C <sub>28</sub> H <sub>22</sub> O <sub>2</sub> |
|          |                    | 390.1831         | -36.8       | -14.4       | 13.0 | C <sub>25</sub> H <sub>26</sub> O <sub>4</sub> |
|          |                    |                  |             |             |      |                                                |

Figure S4. HR-EI-MS spectrum of compound 1

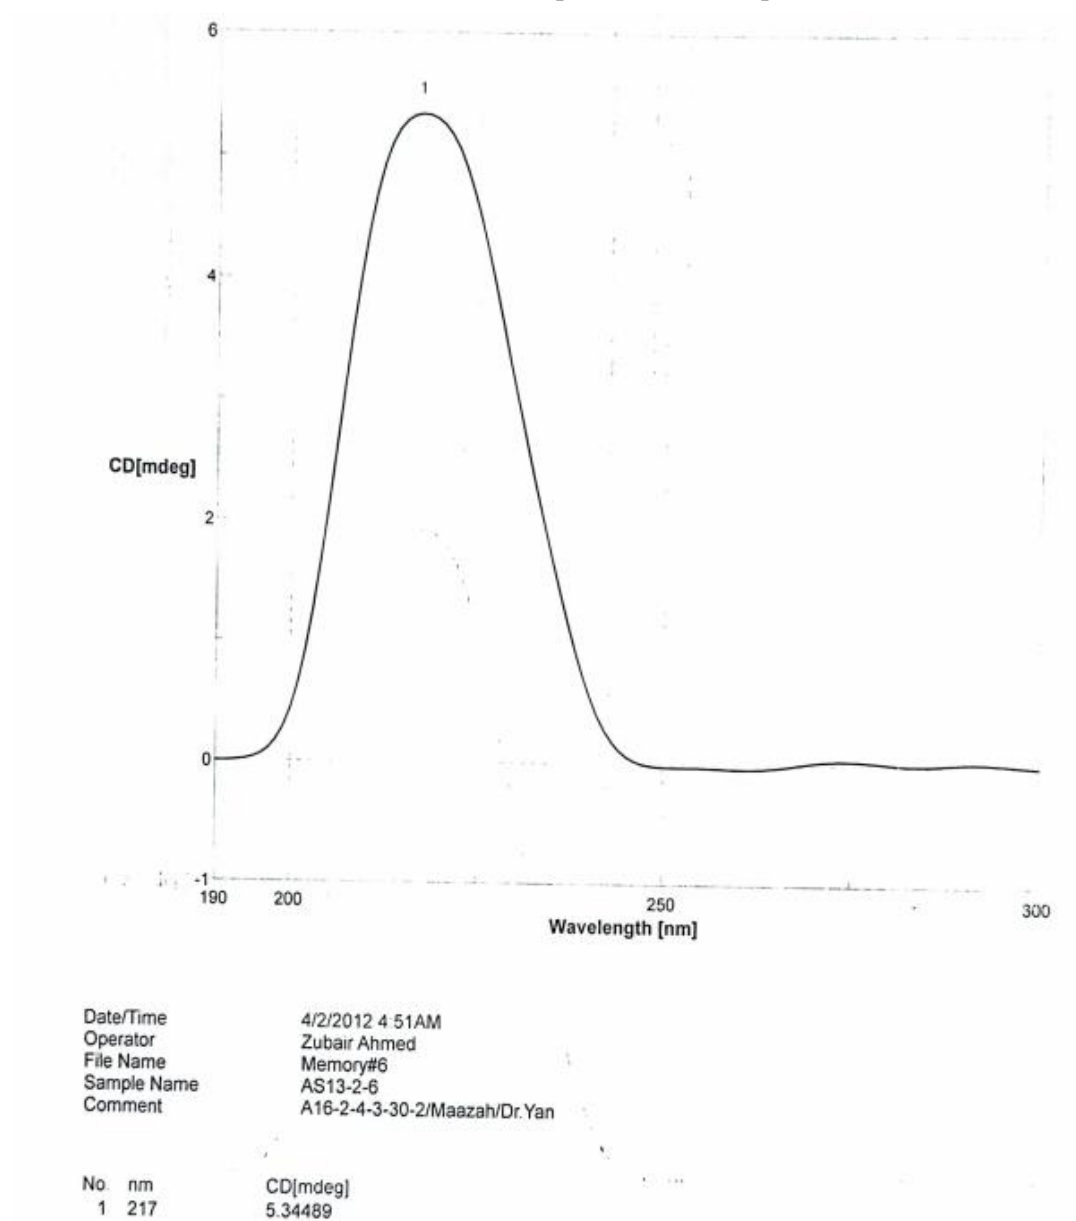

Figure S5. CD spectrum of compound 1

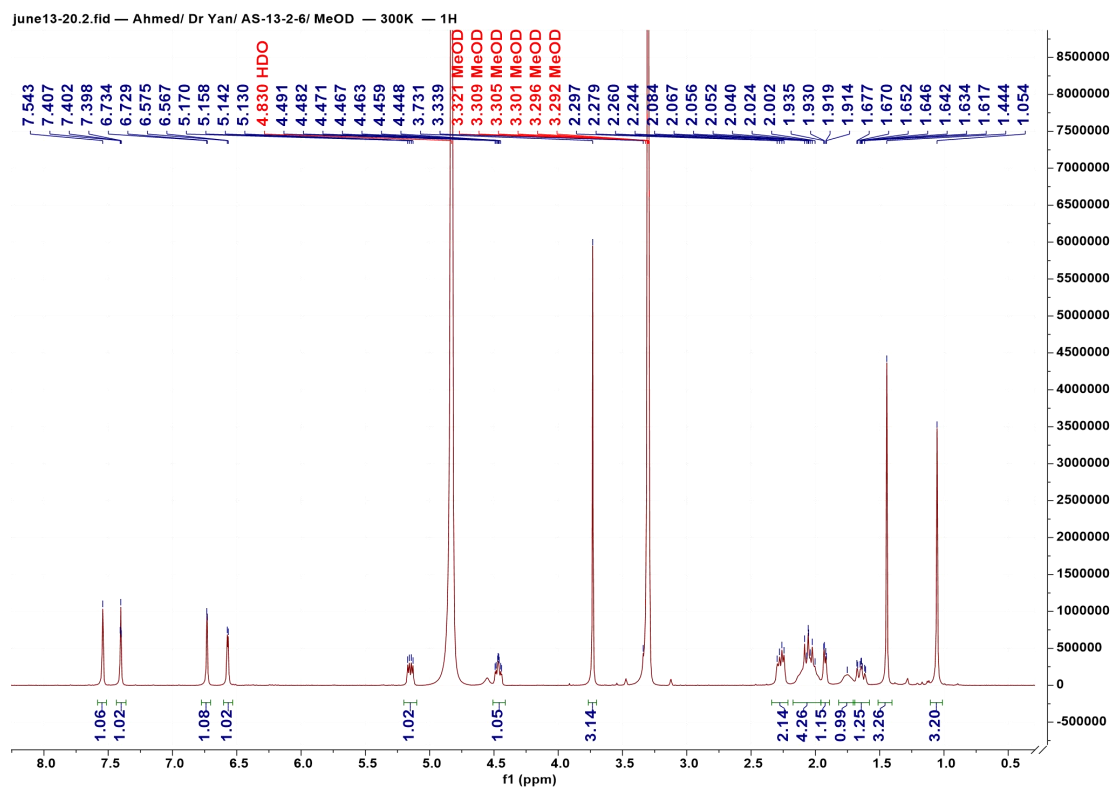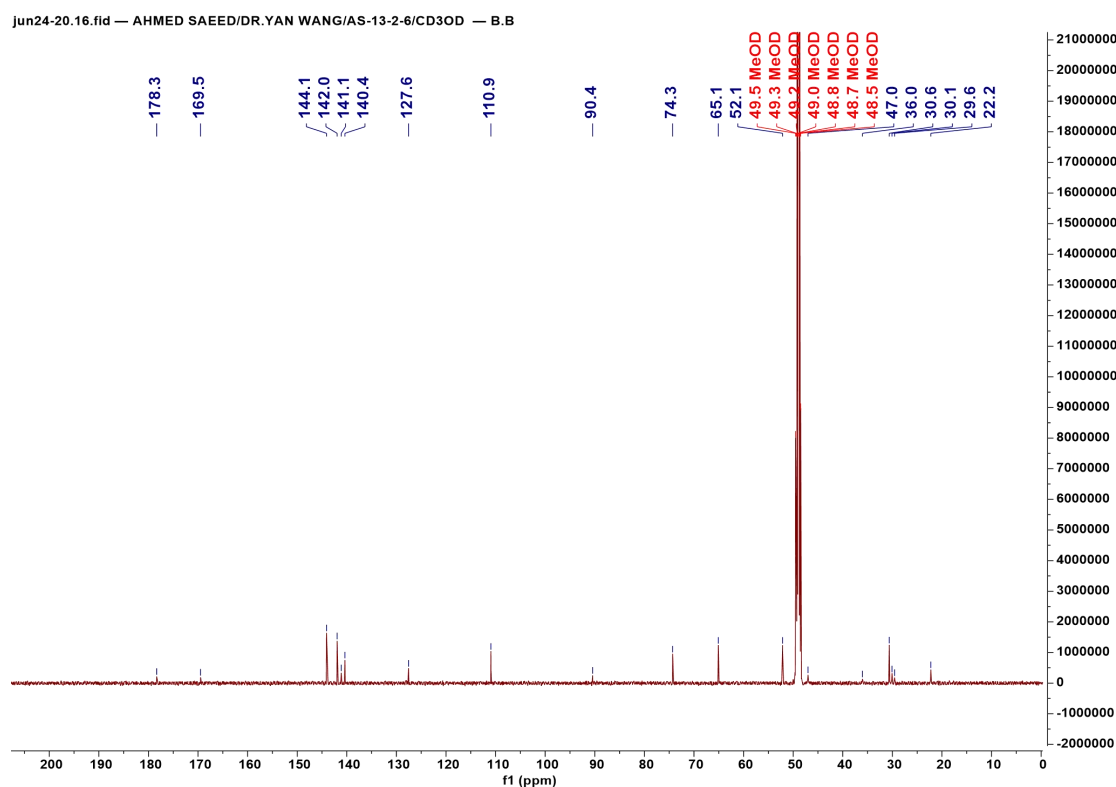

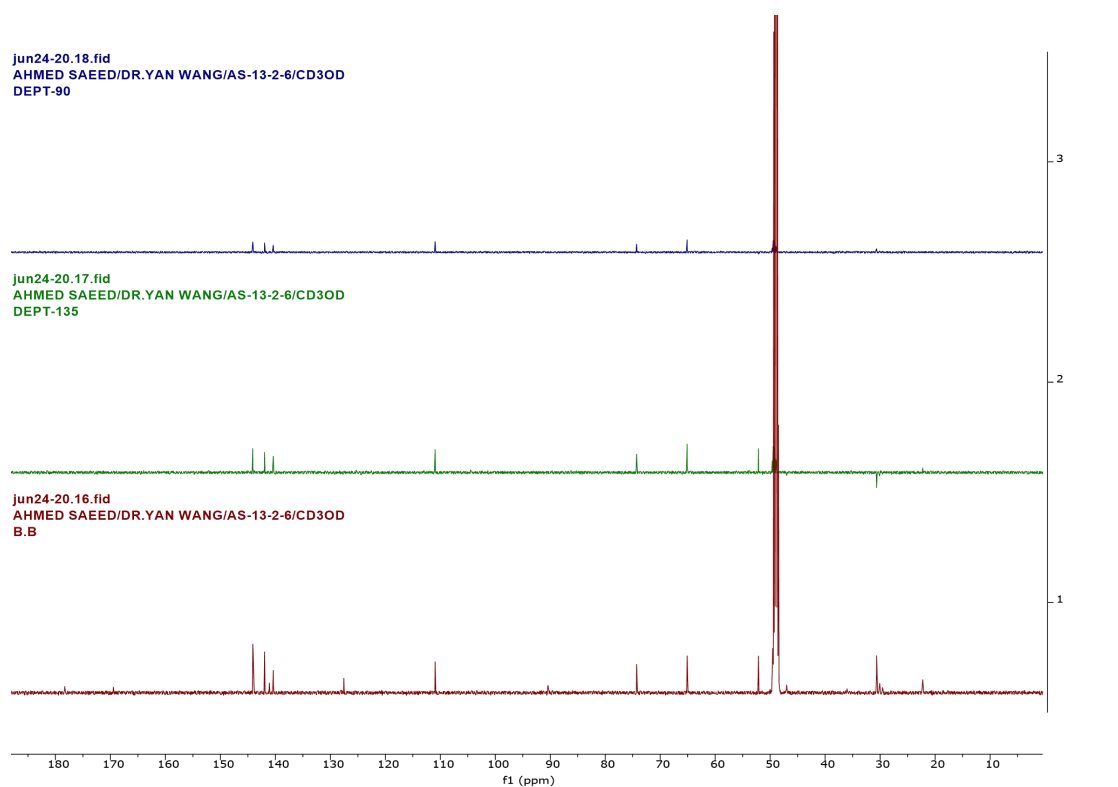

Figure S8. DEPT spectrum of compound 1

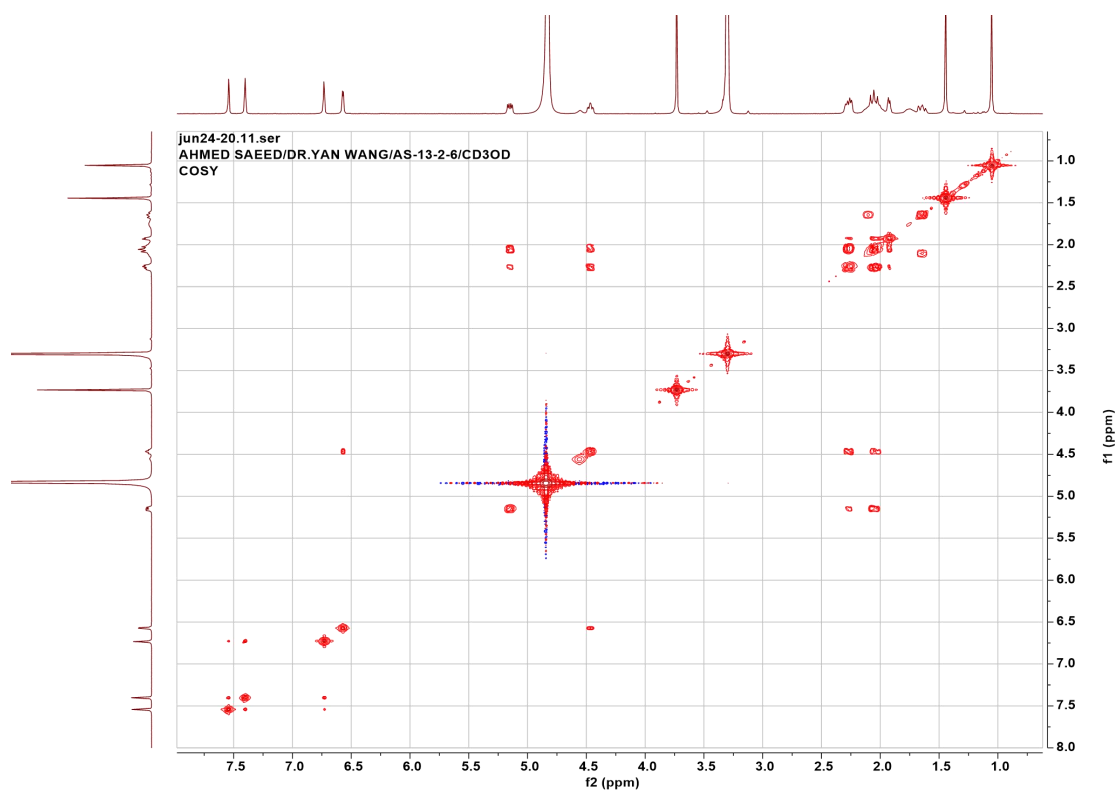

Figure S9.  $^1\text{H}$ - $^1\text{H}$  COSY spectrum of compound 1

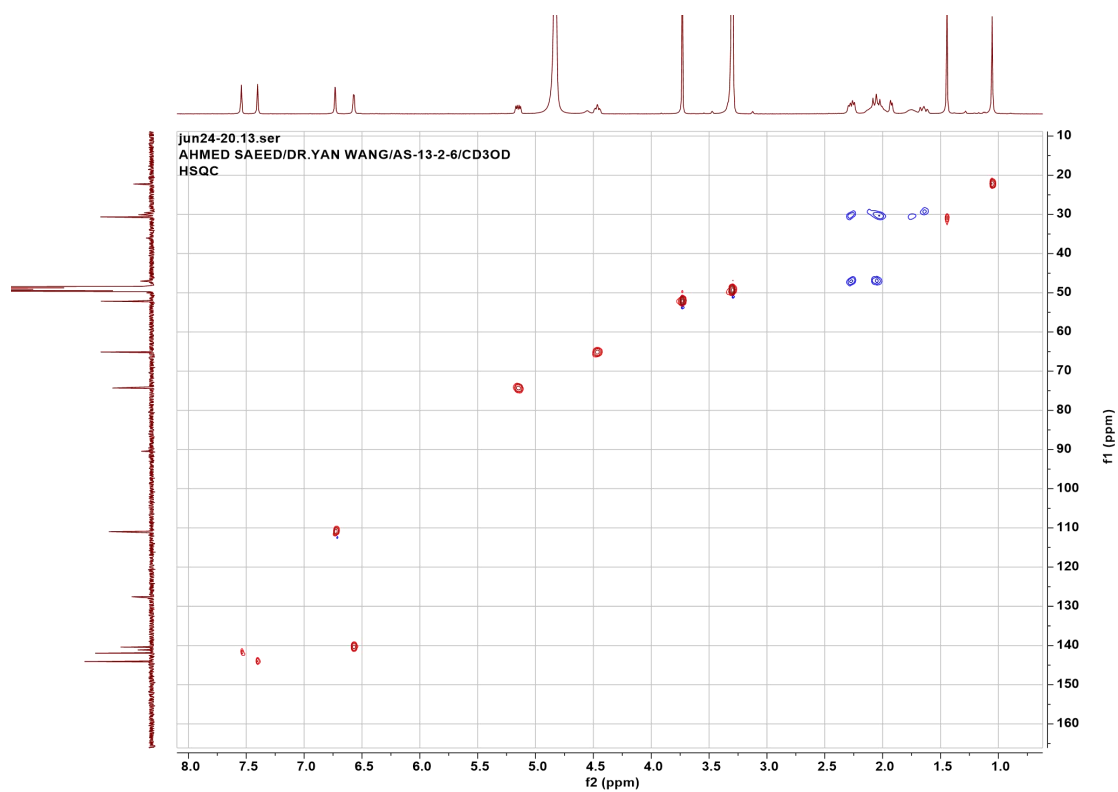

Figure S10. HSQC spectrum of compound 1

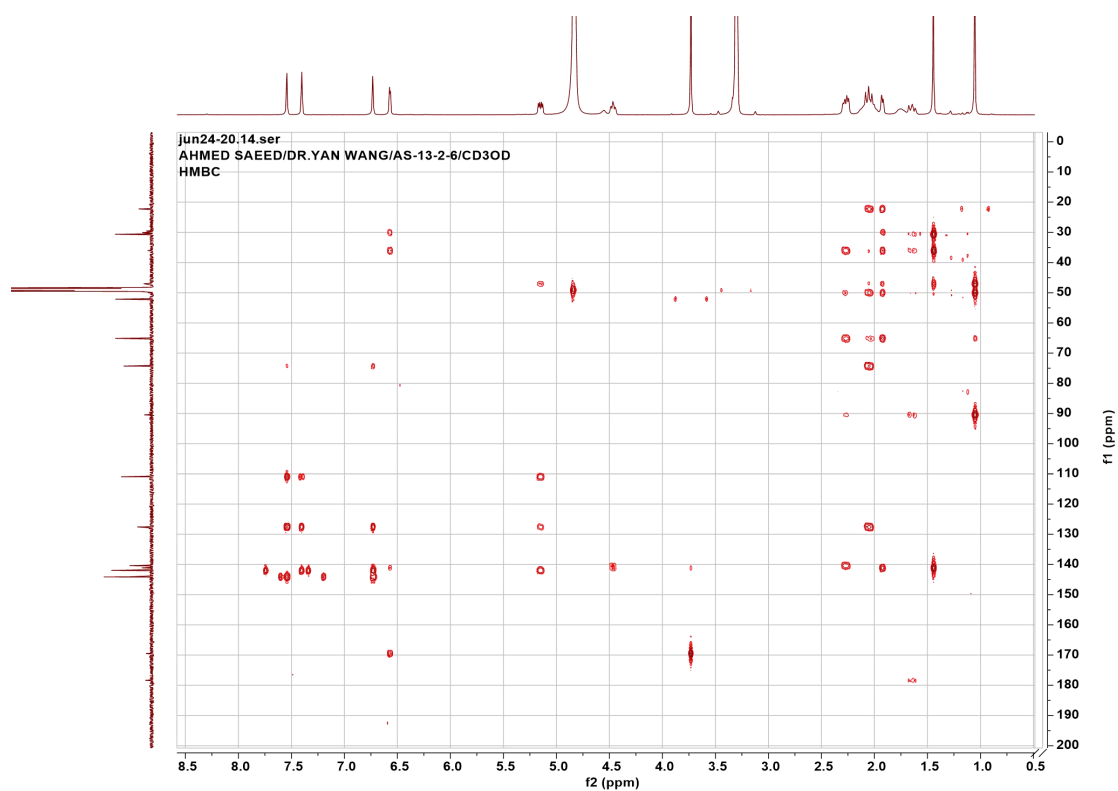

Figure S11. HMBC spectrum of compound 1



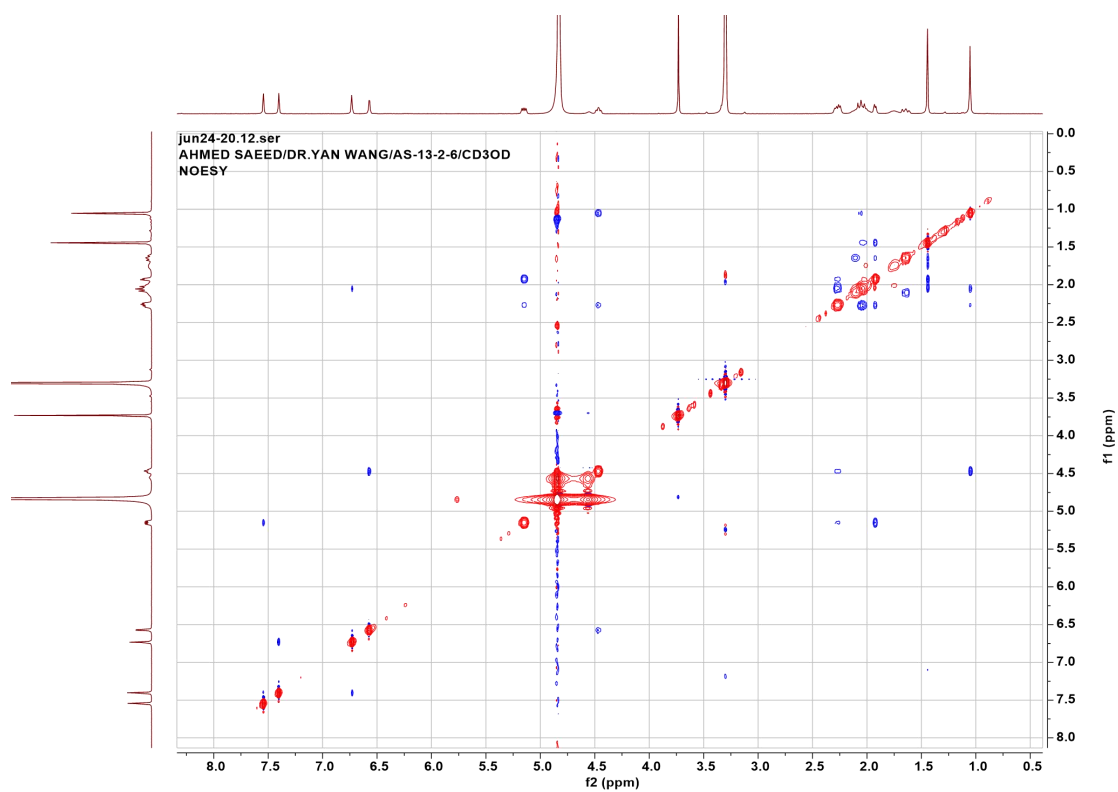

**Figure S12.** NOESY spectrum of compound **1**

# THERMO ELECTRON ~ VISIONpro SOFTWARE V4.10

Operator Name STUDENT Date of Report 7/11/2023  
Department Analytical Lab Nanotechnology center Time of Report 4:28:31PM  
Organization ICCBS, Karachi University  
Information MAAZAH/DR .YAN

## Scan Graph

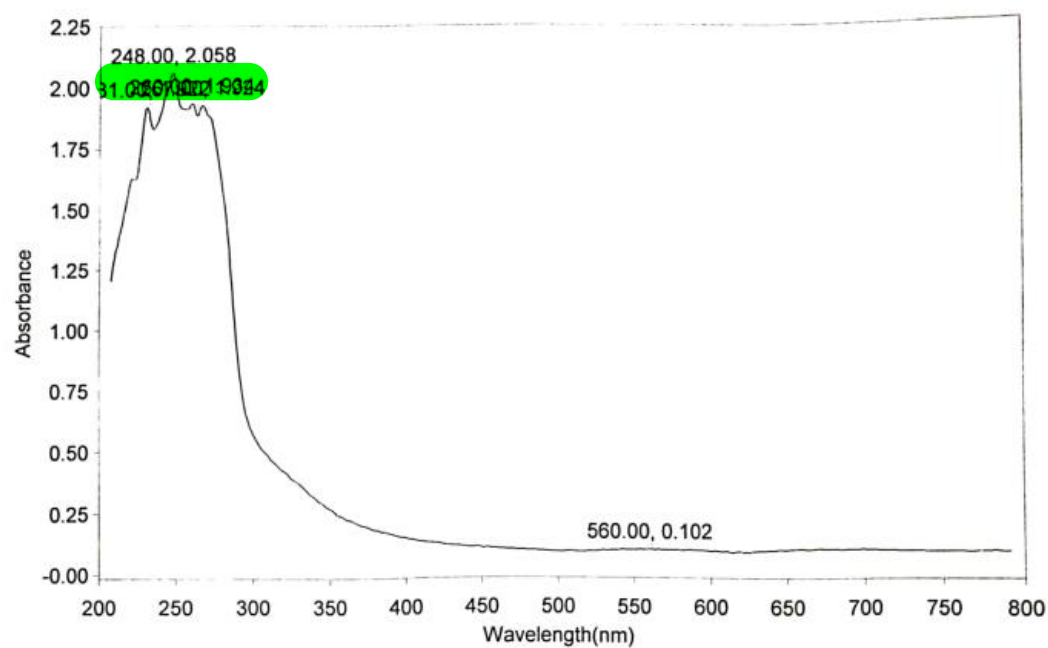

## Results Table - AS16-1-2-4-3-30-20.sre,AS16-2-4-3-30-20,Cycle01

| nm     | A     | Peak Pick Method             |
|--------|-------|------------------------------|
| 231.00 | 1.922 | Find 8 Peaks Above -3.0000 A |
| 248.00 | 2.058 | Start Wavelength200.00 nm    |
| 260.00 | 1.934 | Stop Wavelength600.00 nm     |
| 267.00 | 1.924 | Sort By Wavelength           |
| 560.00 | 0.102 | Sensitivity Medium           |

Figure S13. UV spectrum of compound 10

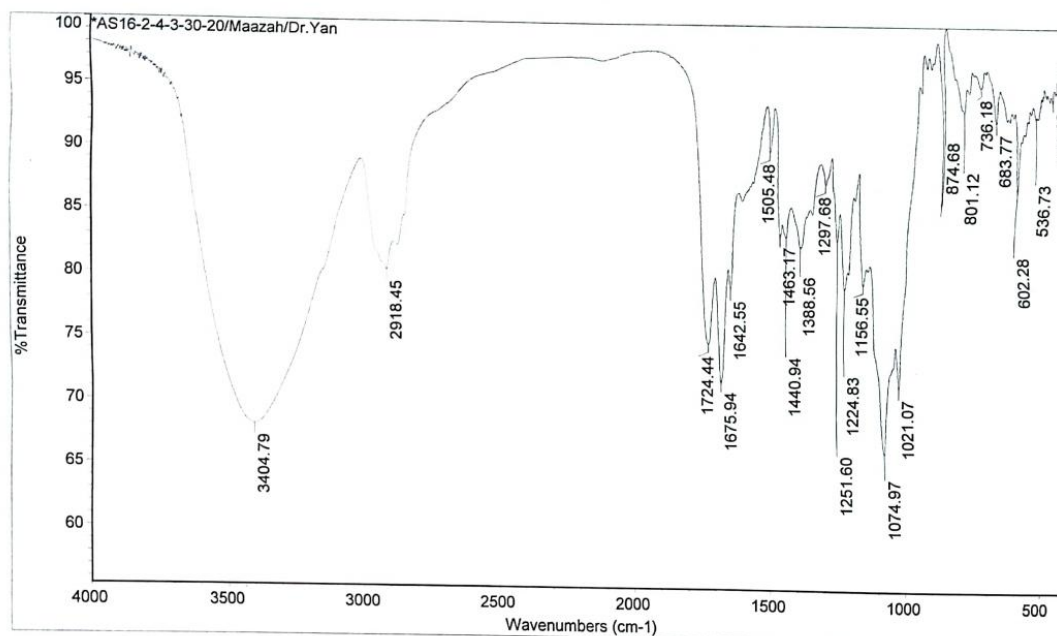

\*AS16-2-4-3-30-20/Maazah/Dr.Yan

Analyst: Zubair Ahmed

Technique: KBr

Number of sample scans: 16  
Number of background scans: 16  
Resolution: 4.000  
Sample gain: 2.0  
Optical velocity: 0.4747  
Aperture: 80.00

Figure S14. IR spectrum of compound 10

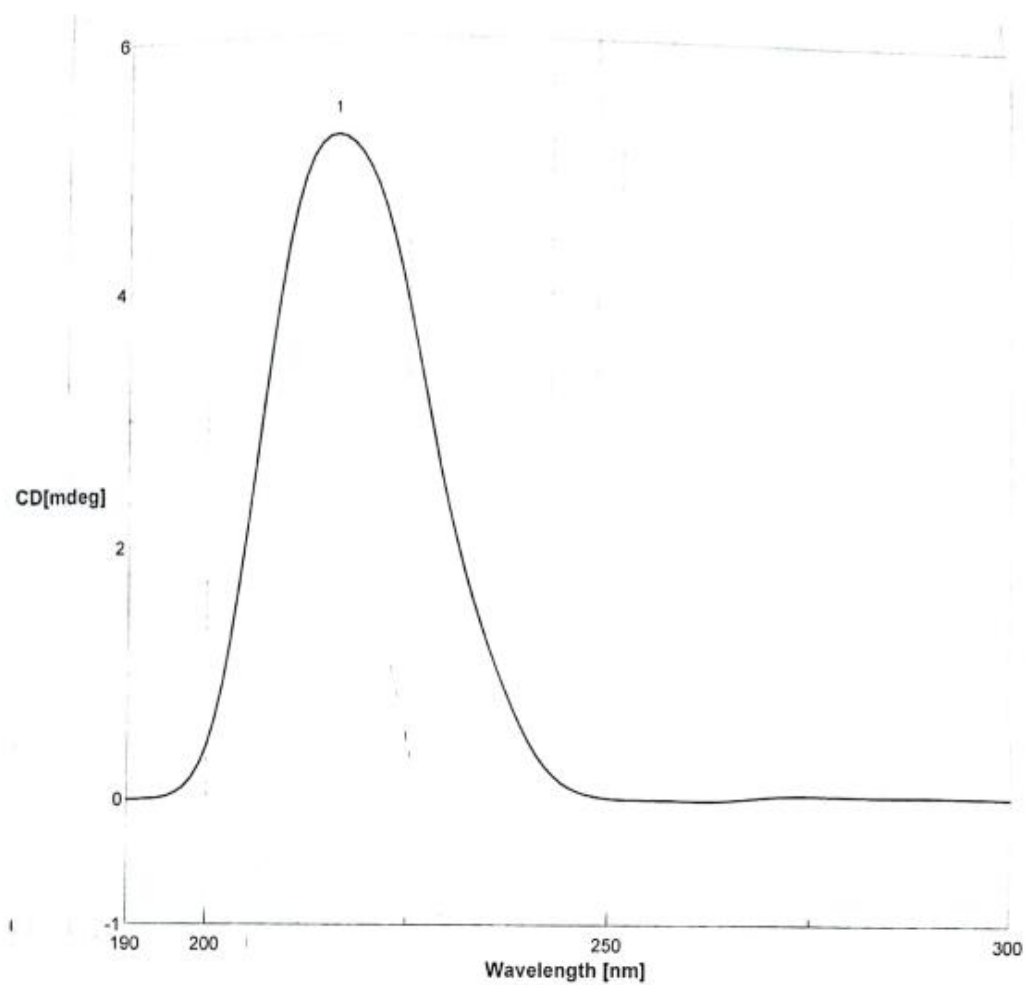

|             |                                |
|-------------|--------------------------------|
| Date/Time   | 4/2/2012 4:40AM                |
| Operator    | Salar                          |
| File Name   | Memory#4                       |
| Sample Name | A16-2-4-3-30-20                |
| Comment     | A16-2-4-3-30-20/Maazah/Dr. Yan |

| No. | nm  | CD[mdeg] |
|-----|-----|----------|
| 1   | 216 | 5.22683  |

**Figure S15.** CD spectrum of compound **10**

File: A16-2-4-3-30-20-FABP  
Sample: MAAZAH /DR. WANG YAN  
Instrument: JEOL-600H-2  
Inlet: Direct Probe

Date Run: 11-30-2021 (Time Run: 13:56:54)

Ionization mode: FAB+

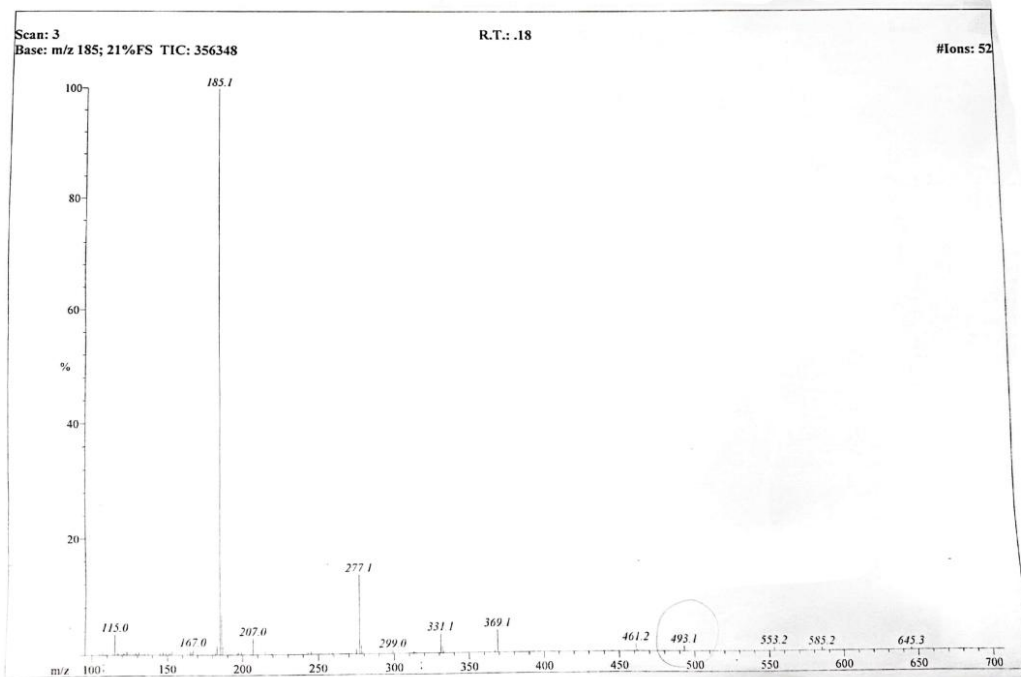

Figure S16. FAB-MS spectrum of compound 10

| HEJ-MASS LAB -ICCBS |         | JEOL HX 110 MASS SPECTROMETER (FAB-HR) |                 |           |
|---------------------|---------|----------------------------------------|-----------------|-----------|
| STUDENT NAME        | MAAZAH  | SAMPLE CODE                            | DATE            | 6/10/2022 |
| SUPERVISOR NAME     | DR. YAN | A16-2-4-3-30-20                        | FAB (+VE / -VE) | +VE       |

| Measured | Theoretical | Delta | Delta | RDB  | Composition |
|----------|-------------|-------|-------|------|-------------|
|          | Mass        | [ppm] | [mmu] |      |             |
| 493.2061 | 493.2074    | -2.6  | -1.3  | 9.5  | C25 H33 O10 |
|          | 493.2015    | 9.3   | 4.6   | 18.5 | C32 H29 O5  |
|          | 493.1956    | 21.2  | 10.5  | 27.5 | C39 H25     |
|          | 493.2168    | -21.6 | -10.7 | 22.5 | C36 H29 O2  |

Figure S17. HR-FAB-MS spectrum of compound 10

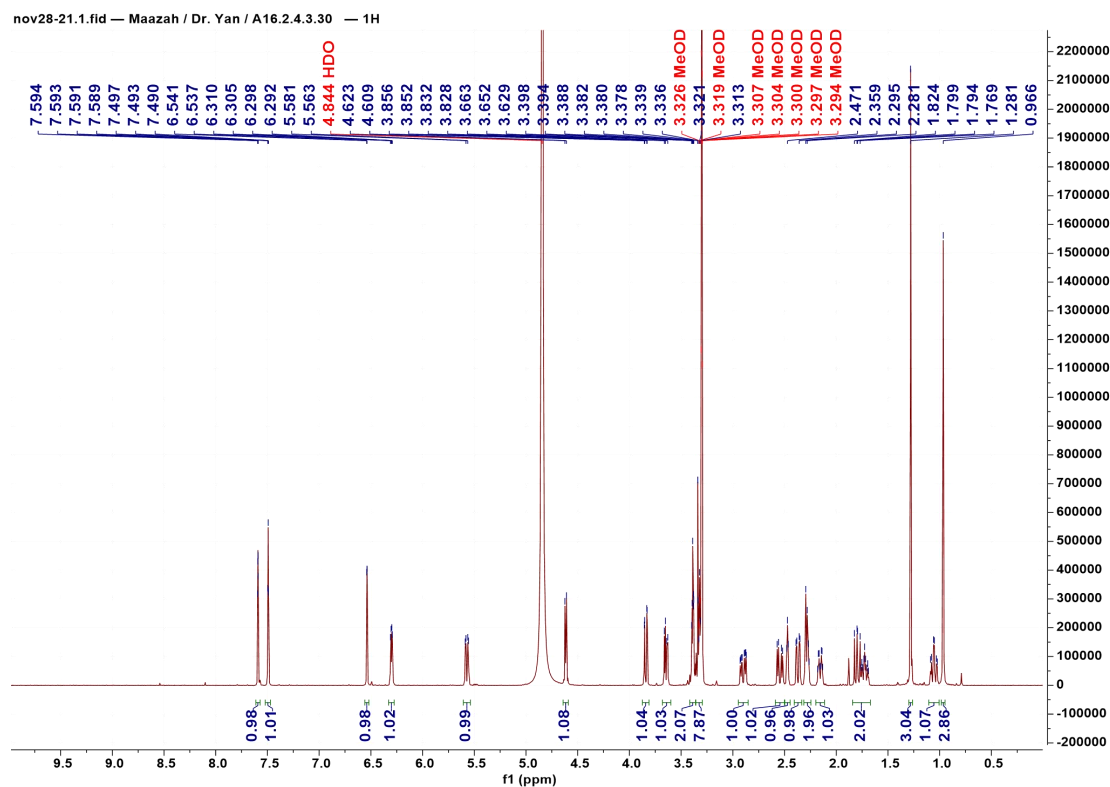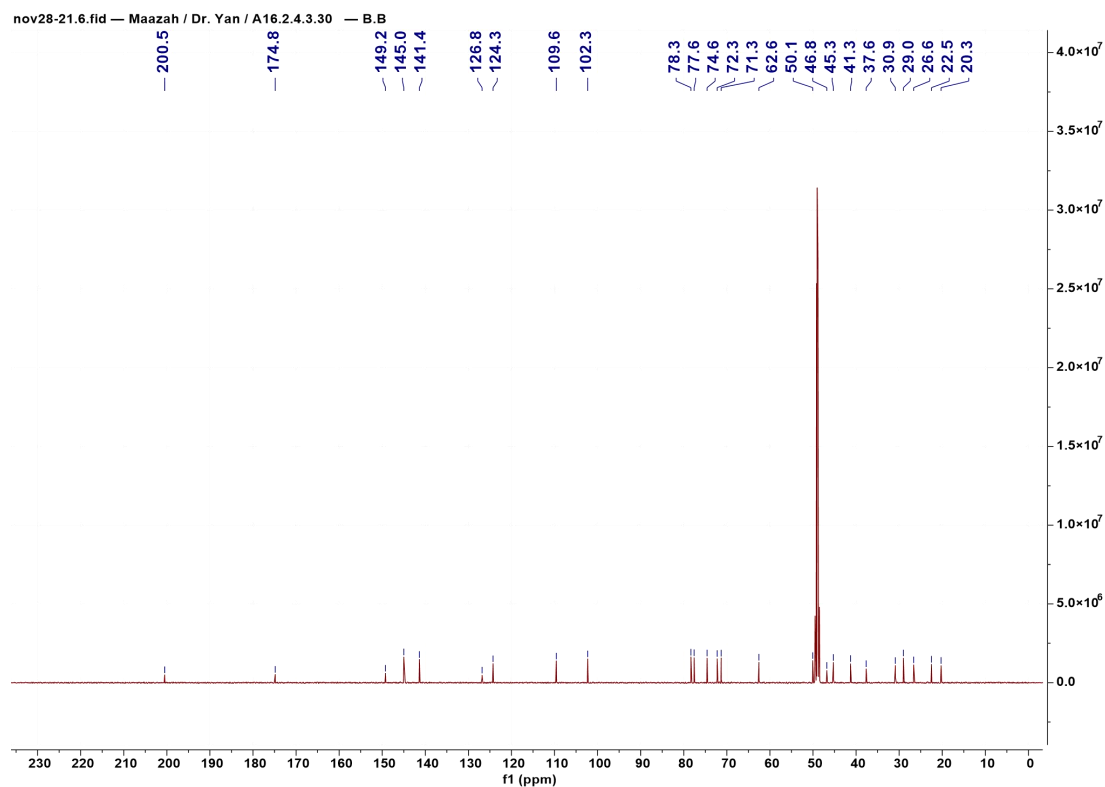

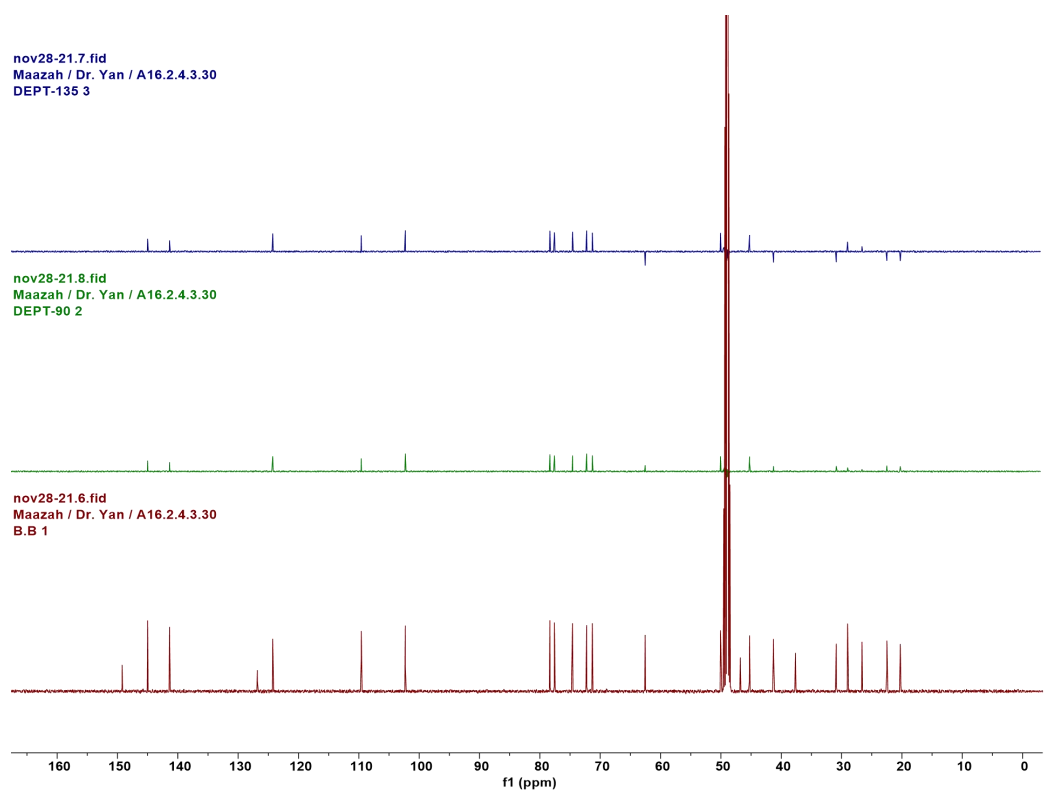

Figure S20. DEPT spectrum of compound 10

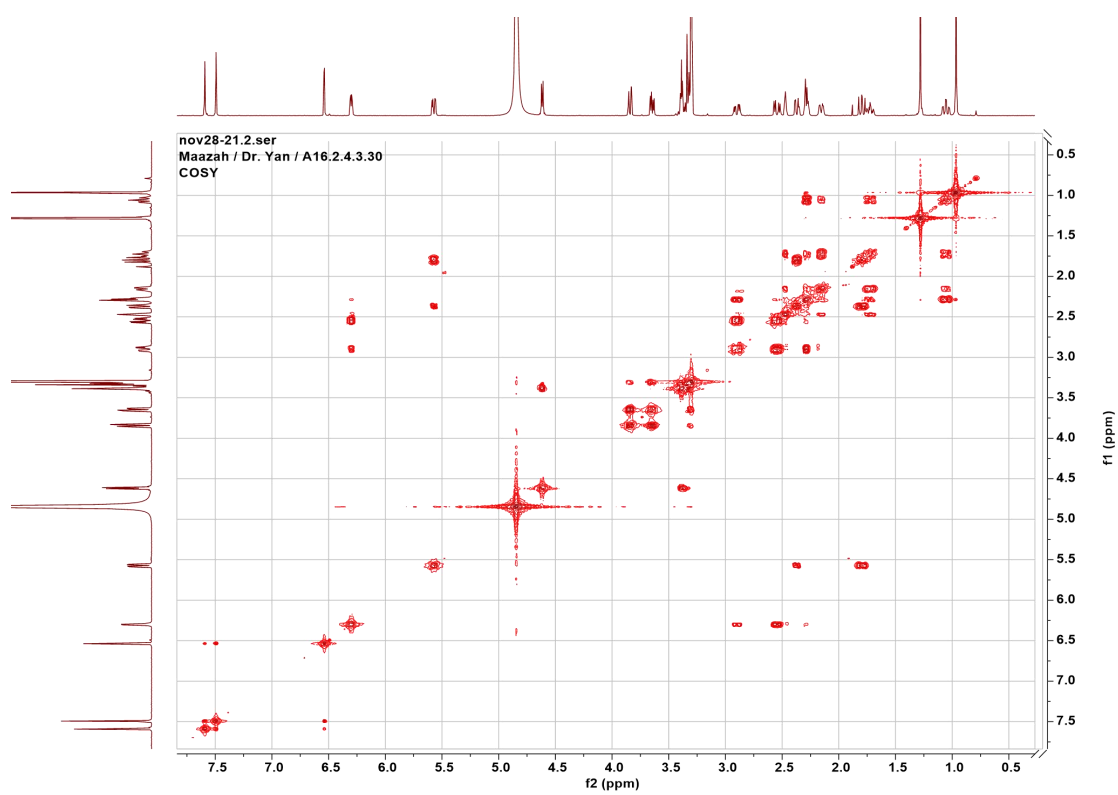

Figure S21.  $^1\text{H}$ - $^1\text{H}$  COSY spectrum of compound 10

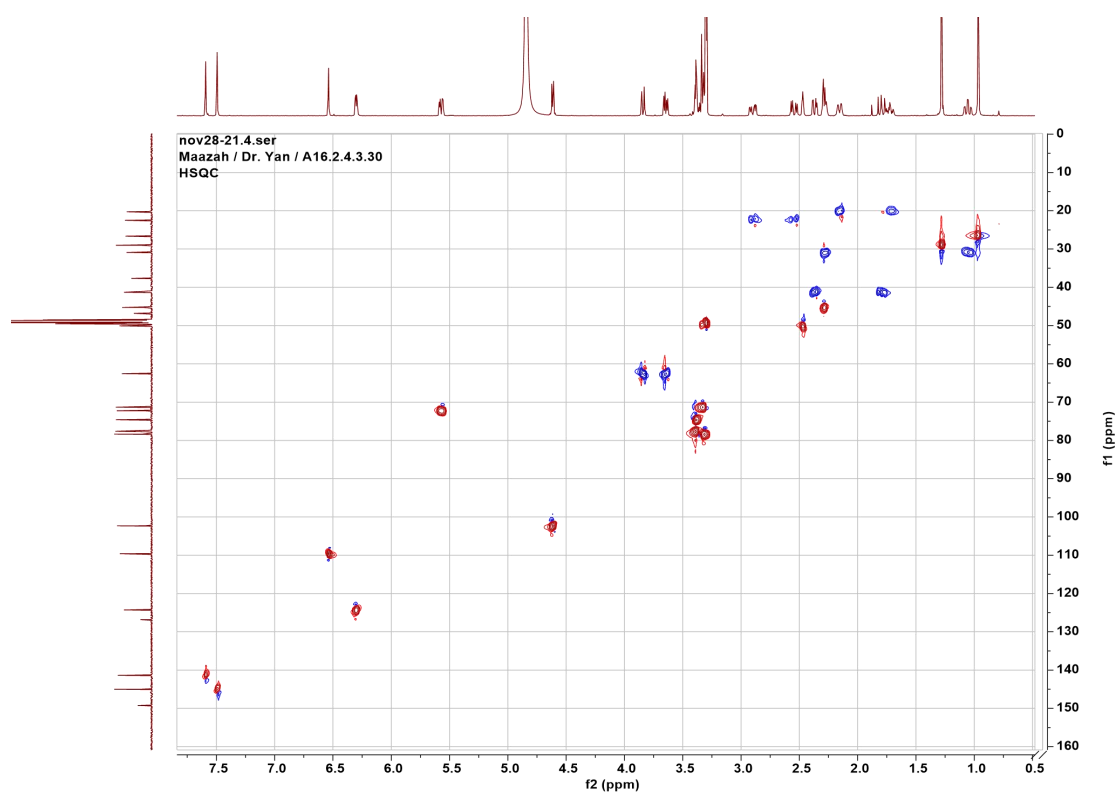

Figure S22. HSQC spectrum of compound 10

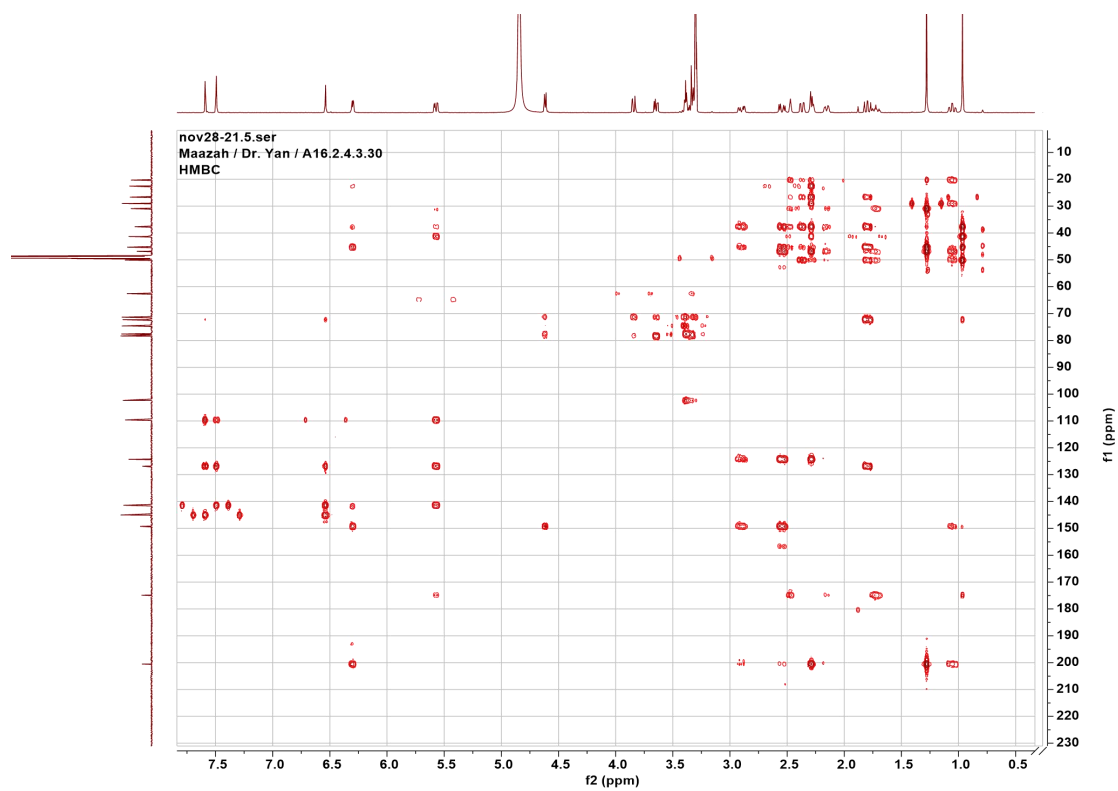

Figure S23. HMBC spectrum of compound 10



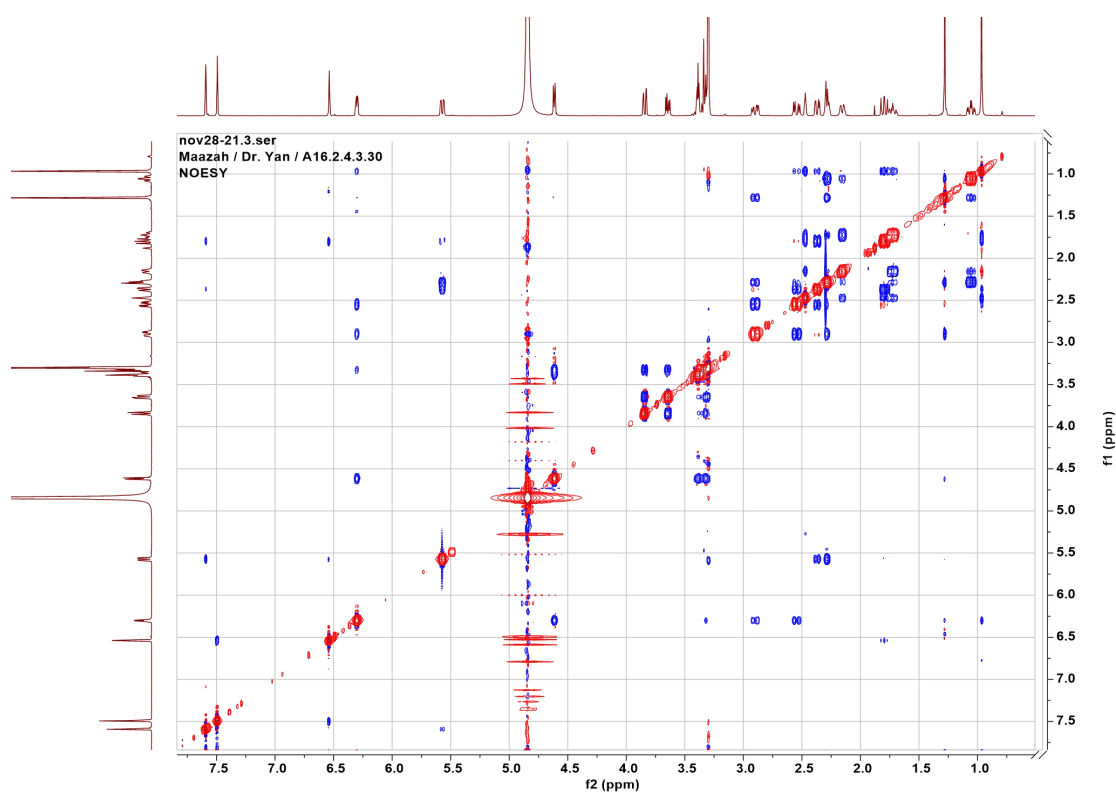

**Figure S24.** NOESY spectrum of compound **10**

## S1. ECD Calculation of compound **1**

### S1.1 Energies at MMFF94 force field

Conformational search with systematic algorithm was performed in Yinfo Cloud Platform (<https://cloud.yinfotek.com/>) using Confab at MMFF94 force field. Conformers were filtered by RMSD threshold of 0.5 Å and energy window of 7 kcal/mol. The energies and populations of dominative conformers were provided in **Table S1**.

**Table S1.** Energies of all Conformers of compound **1** at MMFF94 force field.

| Conformer | Energy (kcal/mol) | Population (%) |
|-----------|-------------------|----------------|
| 1         | 84.31             | 61.9           |
| 2         | 84.73             | 30.4           |
| 3         | 85.68             | 6.1            |
| 4         | 86.49             | 1.6            |

### S1.2 Energies at B3LYP theory level

Structures for ECD calculation were shown in **Table S2**. All structures were confirmed by vibration frequency analysis that no imaginary frequencies were found.

**Table S2.** Energies of all configurations of compound **1** at B3LYP/6-311G(d,p) in

methanol.

| Conformation | Structure                                                                           | E (Hartree)  | E (kcal/mol) | Population (%) |
|--------------|-------------------------------------------------------------------------------------|--------------|--------------|----------------|
| 2            | 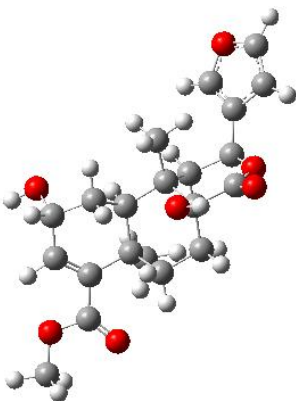   | -1342.779924 | -842607.12   | 59.66          |
| 1            |   | -1342.779004 | -842606.54   | 22.53          |
| 4            |  | -1342.778486 | -842606.21   | 13.01          |
| 3            |  | -1342.777544 | -842605.62   | 4.8            |

### S1.3 Coordinates at B3LYP theory level

**Table S3.** Standard orientations of all configurations of compound **1** at

B3LYP/6-311G(d,p) level in Methanol.

Conformer 1

| Center<br>Number | Atomic<br>Number | Atomic<br>Type | Coordinates (Angstroms) |           |           |
|------------------|------------------|----------------|-------------------------|-----------|-----------|
|                  |                  |                | X                       | Y         | Z         |
| 1                | 6                | 0              | -2.395217               | 2.101363  | 1.538871  |
| 2                | 6                | 0              | -3.443155               | 1.356569  | 0.766458  |
| 3                | 6                | 0              | -3.169388               | 0.324963  | -0.048312 |
| 4                | 6                | 0              | -1.747356               | -0.188620 | -0.372610 |
| 5                | 6                | 0              | -0.650412               | 0.756186  | 0.284936  |
| 6                | 6                | 0              | -1.126140               | 1.276936  | 1.658802  |
| 7                | 6                | 0              | -1.597903               | -1.638081 | 0.173474  |
| 8                | 6                | 0              | -0.173749               | -2.188441 | 0.062015  |
| 9                | 6                | 0              | 0.819794                | -1.307823 | 0.858537  |
| 10               | 6                | 0              | 0.820462                | 0.163908  | 0.361670  |
| 11               | 6                | 0              | 2.210050                | -1.950045 | 0.743728  |
| 12               | 8                | 0              | 2.985972                | -1.697571 | -0.322673 |
| 13               | 6                | 0              | 2.842352                | -0.518188 | -1.169965 |
| 14               | 6                | 0              | 1.473650                | 0.183138  | -1.047444 |
| 15               | 6                | 0              | 4.061181                | 0.344226  | -0.947641 |
| 16               | 6                | 0              | 4.234130                | 1.659540  | -1.269255 |
| 17               | 8                | 0              | 5.508238                | 2.059247  | -0.997531 |
| 18               | 6                | 0              | 6.161900                | 0.974266  | -0.492751 |
| 19               | 6                | 0              | 5.334385                | -0.102473 | -0.444950 |
| 20               | 6                | 0              | 1.709704                | 1.005090  | 1.306915  |
| 21               | 6                | 0              | -1.650444               | -0.180468 | -1.927468 |
| 22               | 8                | 0              | 2.574934                | -2.765658 | 1.567187  |
| 23               | 6                | 0              | -4.340334               | -0.390598 | -0.665717 |
| 24               | 8                | 0              | -4.317134               | -1.505668 | -1.154157 |
| 25               | 8                | 0              | 0.460788                | -1.350469 | 2.234355  |
| 26               | 8                | 0              | -2.049727               | 3.343546  | 0.898081  |
| 27               | 8                | 0              | -5.483672               | 0.338114  | -0.619274 |
| 28               | 6                | 0              | -6.648660               | -0.319395 | -1.139628 |
| 29               | 1                | 0              | -2.783845               | 2.313599  | 2.548136  |
| 30               | 1                | 0              | -4.476807               | 1.665315  | 0.896871  |
| 31               | 1                | 0              | -0.577833               | 1.644948  | -0.356507 |
| 32               | 1                | 0              | -1.294764               | 0.448974  | 2.354297  |
| 33               | 1                | 0              | -0.371074               | 1.923505  | 2.106985  |
| 34               | 1                | 0              | -2.291004               | -2.294432 | -0.356212 |
| 35               | 1                | 0              | -1.883686               | -1.654923 | 1.230687  |

|    |   |   |           |           |           |
|----|---|---|-----------|-----------|-----------|
| 36 | 1 | 0 | 0.139375  | -2.282754 | -0.984726 |
| 37 | 1 | 0 | -0.137005 | -3.197836 | 0.488131  |
| 38 | 1 | 0 | 2.912304  | -0.941293 | -2.178661 |
| 39 | 1 | 0 | 1.590098  | 1.224865  | -1.366746 |
| 40 | 1 | 0 | 0.813146  | -0.278710 | -1.775033 |
| 41 | 1 | 0 | 3.590405  | 2.419071  | -1.685468 |
| 42 | 1 | 0 | 7.192417  | 1.135866  | -0.215688 |
| 43 | 1 | 0 | 5.568105  | -1.093982 | -0.086366 |
| 44 | 1 | 0 | 2.755935  | 0.693546  | 1.236626  |
| 45 | 1 | 0 | 1.671634  | 2.066566  | 1.036382  |
| 46 | 1 | 0 | 1.407655  | 0.890972  | 2.347217  |
| 47 | 1 | 0 | -1.497286 | 0.836437  | -2.305597 |
| 48 | 1 | 0 | -2.560673 | -0.581443 | -2.374865 |
| 49 | 1 | 0 | -0.838434 | -0.807463 | -2.300372 |
| 50 | 1 | 0 | 0.989174  | -2.083070 | 2.607568  |
| 51 | 1 | 0 | -2.872831 | 3.819461  | 0.704206  |
| 52 | 1 | 0 | -7.461457 | 0.399146  | -1.028337 |
| 53 | 1 | 0 | -6.861909 | -1.232007 | -0.576536 |
| 54 | 1 | 0 | -6.505936 | -0.579000 | -2.191869 |

#### Conformer 2

| Center<br>Number | Atomic<br>Number | Atomic<br>Type | Coordinates (Angstroms) |           |           |
|------------------|------------------|----------------|-------------------------|-----------|-----------|
|                  |                  |                | X                       | Y         | Z         |
| 1                | 6                | 0              | 2.398439                | -2.105256 | 1.540012  |
| 2                | 6                | 0              | 3.446914                | -1.356207 | 0.772497  |
| 3                | 6                | 0              | 3.173176                | -0.323220 | -0.040514 |
| 4                | 6                | 0              | 1.750960                | 0.187786  | -0.367744 |
| 5                | 6                | 0              | 0.654743                | -0.764136 | 0.279480  |
| 6                | 6                | 0              | 1.125460                | -1.286059 | 1.654759  |
| 7                | 6                | 0              | 1.593244                | 1.632676  | 0.187106  |
| 8                | 6                | 0              | 0.167928                | 2.177655  | 0.067795  |
| 9                | 6                | 0              | -0.830034               | 1.290231  | 0.852509  |
| 10               | 6                | 0              | -0.819985               | -0.180352 | 0.349939  |
| 11               | 6                | 0              | -2.217817               | 1.933435  | 0.720363  |
| 12               | 8                | 0              | -2.962585               | 1.710085  | -0.376659 |
| 13               | 6                | 0              | -2.831258               | 0.515337  | -1.197924 |
| 14               | 6                | 0              | -1.468633               | -0.200897 | -1.060700 |
| 15               | 6                | 0              | -4.058965               | -0.326710 | -0.960846 |
| 16               | 6                | 0              | -5.153160               | 0.013059  | -0.220844 |
| 17               | 8                | 0              | -6.100017               | -0.966379 | -0.286079 |
| 18               | 6                | 0              | -5.603523               | -1.942956 | -1.094052 |
| 19               | 6                | 0              | -4.362464               | -1.609987 | -1.539552 |
| 20               | 6                | 0              | -1.708476               | -1.035287 | 1.283628  |
| 21               | 6                | 0              | 1.660672                | 0.190045  | -1.922922 |
| 22               | 8                | 0              | -2.604996               | 2.731081  | 1.550890  |

|    |   |   |           |           |           |
|----|---|---|-----------|-----------|-----------|
| 23 | 6 | 0 | 4.344298  | 0.397318  | -0.651443 |
| 24 | 8 | 0 | 4.321681  | 1.517329  | -1.128463 |
| 25 | 8 | 0 | -0.485977 | 1.329182  | 2.231767  |
| 26 | 8 | 0 | 2.060963  | -3.348675 | 0.897337  |
| 27 | 8 | 0 | 5.486926  | -0.333035 | -0.613143 |
| 28 | 6 | 0 | 6.652329  | 0.328689  | -1.127322 |
| 29 | 1 | 0 | 2.783550  | -2.316284 | 2.550916  |
| 30 | 1 | 0 | 4.480927  | -1.662897 | 0.905258  |
| 31 | 1 | 0 | 0.589856  | -1.651267 | -0.365119 |
| 32 | 1 | 0 | 1.287131  | -0.458849 | 2.352837  |
| 33 | 1 | 0 | 0.370781  | -1.936313 | 2.098039  |
| 34 | 1 | 0 | 2.287584  | 2.295247  | -0.333230 |
| 35 | 1 | 0 | 1.871406  | 1.643698  | 1.246433  |
| 36 | 1 | 0 | -0.138080 | 2.274372  | -0.980749 |
| 37 | 1 | 0 | 0.124164  | 3.185283  | 0.497553  |
| 38 | 1 | 0 | -2.890570 | 0.907357  | -2.220155 |
| 39 | 1 | 0 | -1.601620 | -1.243715 | -1.370575 |
| 40 | 1 | 0 | -0.800835 | 0.246754  | -1.790737 |
| 41 | 1 | 0 | -5.395733 | 0.874971  | 0.379727  |
| 42 | 1 | 0 | -6.243929 | -2.798342 | -1.246624 |
| 43 | 1 | 0 | -3.739109 | -2.199903 | -2.197591 |
| 44 | 1 | 0 | -2.757397 | -0.737387 | 1.200062  |
| 45 | 1 | 0 | -1.651972 | -2.094863 | 1.008762  |
| 46 | 1 | 0 | -1.421155 | -0.921683 | 2.328251  |
| 47 | 1 | 0 | 1.512757  | -0.824760 | -2.308675 |
| 48 | 1 | 0 | 2.571270  | 0.597585  | -2.363644 |
| 49 | 1 | 0 | 0.847868  | 0.816710  | -2.294588 |
| 50 | 1 | 0 | -1.025507 | 2.053576  | 2.604751  |
| 51 | 1 | 0 | 2.887042  | -3.819706 | 0.704237  |
| 52 | 1 | 0 | 7.464358  | -0.391979 | -1.024468 |
| 53 | 1 | 0 | 6.867148  | 1.234939  | -0.554634 |
| 54 | 1 | 0 | 6.509026  | 0.599765  | -2.176585 |

Conformer 3

| Center<br>Number | Atomic<br>Number | Atomic<br>Type | Coordinates (Angstroms) |           |           |
|------------------|------------------|----------------|-------------------------|-----------|-----------|
|                  |                  |                | X                       | Y         | Z         |
| 1                | 6                | 0              | -2.322470               | 2.468074  | 1.297931  |
| 2                | 6                | 0              | -3.406754               | 1.698473  | 0.608150  |
| 3                | 6                | 0              | -3.200053               | 0.557125  | -0.068059 |
| 4                | 6                | 0              | -1.810437               | -0.072057 | -0.323264 |
| 5                | 6                | 0              | -0.662951               | 0.893555  | 0.212409  |
| 6                | 6                | 0              | -1.100166               | 1.594835  | 1.516918  |
| 7                | 6                | 0              | -1.718616               | -1.446136 | 0.403344  |
| 8                | 6                | 0              | -0.321490               | -2.070230 | 0.363291  |
| 9                | 6                | 0              | 0.716976                | -1.141520 | 1.037377  |

|    |   |   |           |           |           |
|----|---|---|-----------|-----------|-----------|
| 10 | 6 | 0 | 0.781873  | 0.249214  | 0.351094  |
| 11 | 6 | 0 | 2.074004  | -1.859278 | 1.004490  |
| 12 | 8 | 0 | 2.849734  | -1.787452 | -0.089521 |
| 13 | 6 | 0 | 2.752468  | -0.724590 | -1.085182 |
| 14 | 6 | 0 | 1.419831  | 0.052831  | -1.051030 |
| 15 | 6 | 0 | 4.011946  | 0.101709  | -0.985127 |
| 16 | 6 | 0 | 4.246453  | 1.343469  | -1.501560 |
| 17 | 8 | 0 | 5.537962  | 1.720024  | -1.284790 |
| 18 | 6 | 0 | 6.139919  | 0.695380  | -0.616546 |
| 19 | 6 | 0 | 5.262613  | -0.322008 | -0.411440 |
| 20 | 6 | 0 | 1.719273  | 1.165081  | 1.172509  |
| 21 | 6 | 0 | -1.714137 | -0.256991 | -1.867965 |
| 22 | 8 | 0 | 2.408681  | -2.574737 | 1.927742  |
| 23 | 6 | 0 | -4.480694 | -0.049428 | -0.594702 |
| 24 | 8 | 0 | -5.534951 | 0.550518  | -0.680090 |
| 25 | 8 | 0 | 0.365562  | -0.988228 | 2.406921  |
| 26 | 8 | 0 | -1.909739 | 3.608976  | 0.522471  |
| 27 | 8 | 0 | -4.380417 | -1.357088 | -0.937093 |
| 28 | 6 | 0 | -5.599735 | -1.965468 | -1.395667 |
| 29 | 1 | 0 | -2.699015 | 2.813945  | 2.274262  |
| 30 | 1 | 0 | -4.424910 | 2.076859  | 0.670083  |
| 31 | 1 | 0 | -0.560248 | 1.696320  | -0.530220 |
| 32 | 1 | 0 | -1.310145 | 0.863761  | 2.303568  |
| 33 | 1 | 0 | -0.308567 | 2.246160  | 1.888158  |
| 34 | 1 | 0 | -2.437778 | -2.140832 | -0.034516 |
| 35 | 1 | 0 | -1.999957 | -1.314868 | 1.453534  |
| 36 | 1 | 0 | -0.020241 | -2.314442 | -0.662382 |
| 37 | 1 | 0 | -0.327941 | -3.016476 | 0.917050  |
| 38 | 1 | 0 | 2.791454  | -1.280253 | -2.029127 |
| 39 | 1 | 0 | 1.584597  | 1.038010  | -1.500905 |
| 40 | 1 | 0 | 0.731157  | -0.464969 | -1.711725 |
| 41 | 1 | 0 | 3.639391  | 2.059971  | -2.033307 |
| 42 | 1 | 0 | 7.176907  | 0.849256  | -0.360042 |
| 43 | 1 | 0 | 5.449817  | -1.257536 | 0.094483  |
| 44 | 1 | 0 | 2.751676  | 0.806841  | 1.128364  |
| 45 | 1 | 0 | 1.715736  | 2.185333  | 0.772248  |
| 46 | 1 | 0 | 1.431416  | 1.192800  | 2.222633  |
| 47 | 1 | 0 | -1.462795 | 0.688181  | -2.361214 |
| 48 | 1 | 0 | -2.658980 | -0.612469 | -2.280981 |
| 49 | 1 | 0 | -0.967856 | -1.000534 | -2.155608 |
| 50 | 1 | 0 | 0.868548  | -1.684207 | 2.873757  |
| 51 | 1 | 0 | -2.706924 | 4.097484  | 0.262468  |
| 52 | 1 | 0 | -5.340489 | -3.000686 | -1.619420 |
| 53 | 1 | 0 | -5.970092 | -1.457572 | -2.289709 |

| 54               | 1                | 0              | -6.366512               | -1.918422 | -0.618407 |
|------------------|------------------|----------------|-------------------------|-----------|-----------|
| Conformer 4      |                  |                |                         |           |           |
| Center<br>Number | Atomic<br>Number | Atomic<br>Type | Coordinates (Angstroms) |           |           |
|                  |                  |                | X                       | Y         | Z         |
| 1                | 6                | 0              | -2.322548               | 2.481477  | 1.280424  |
| 2                | 6                | 0              | -3.408906               | 1.704655  | 0.602115  |
| 3                | 6                | 0              | -3.203524               | 0.557522  | -0.064598 |
| 4                | 6                | 0              | -1.814090               | -0.071743 | -0.320436 |
| 5                | 6                | 0              | -0.665818               | 0.901691  | 0.197658  |
| 6                | 6                | 0              | -1.097168               | 1.612415  | 1.499129  |
| 7                | 6                | 0              | -1.713883               | -1.436354 | 0.421978  |
| 8                | 6                | 0              | -0.316000               | -2.057674 | 0.375850  |
| 9                | 6                | 0              | 0.728417                | -1.121204 | 1.031423  |
| 10               | 6                | 0              | 0.782990                | 0.264596  | 0.332470  |
| 11               | 6                | 0              | 2.082254                | -1.843956 | 0.984374  |
| 12               | 8                | 0              | 2.825466                | -1.809145 | -0.135990 |
| 13               | 6                | 0              | 2.742887                | -0.731225 | -1.111810 |
| 14               | 6                | 0              | 1.416116                | 0.060314  | -1.070217 |
| 15               | 6                | 0              | 4.009039                | 0.078131  | -0.994362 |
| 16               | 6                | 0              | 5.096214                | -0.208918 | -0.222425 |
| 17               | 8                | 0              | 6.082639                | 0.711668  | -0.421094 |
| 18               | 6                | 0              | 5.618839                | 1.594659  | -1.347479 |
| 19               | 6                | 0              | 4.359920                | 1.260326  | -1.738314 |
| 20               | 6                | 0              | 1.719709                | 1.196240  | 1.136814  |
| 21               | 6                | 0              | -1.726509               | -0.274777 | -1.863150 |
| 22               | 8                | 0              | 2.438583                | -2.538703 | 1.915013  |
| 23               | 6                | 0              | -4.485382               | -0.056087 | -0.579563 |
| 24               | 8                | 0              | -5.539533               | 0.542947  | -0.672130 |
| 25               | 8                | 0              | 0.393456                | -0.957248 | 2.403320  |
| 26               | 8                | 0              | -1.916653               | 3.617762  | 0.494705  |
| 27               | 8                | 0              | -4.386267               | -1.369097 | -0.901296 |
| 28               | 6                | 0              | -5.606899               | -1.984605 | -1.346608 |
| 29               | 1                | 0              | -2.694636               | 2.833496  | 2.256297  |
| 30               | 1                | 0              | -4.427234               | 2.082437  | 0.665133  |
| 31               | 1                | 0              | -0.570323               | 1.698121  | -0.552726 |
| 32               | 1                | 0              | -1.301452               | 0.887000  | 2.292560  |
| 33               | 1                | 0              | -0.305117               | 2.268077  | 1.861320  |
| 34               | 1                | 0              | -2.435490               | -2.137820 | -0.000866 |
| 35               | 1                | 0              | -1.985846               | -1.293064 | 1.473106  |
| 36               | 1                | 0              | -0.023067               | -2.310845 | -0.649980 |
| 37               | 1                | 0              | -0.315881               | -2.998687 | 0.938578  |
| 38               | 1                | 0              | 2.775397                | -1.260703 | -2.071346 |
| 39               | 1                | 0              | 1.594514                | 1.042967  | -1.521186 |
| 40               | 1                | 0              | 0.721391                | -0.451242 | -1.729741 |

|    |   |   |           |           |           |
|----|---|---|-----------|-----------|-----------|
| 41 | 1 | 0 | 5.309327  | -0.993960 | 0.485146  |
| 42 | 1 | 0 | 6.292878  | 2.394288  | -1.614543 |
| 43 | 1 | 0 | 3.754711  | 1.785779  | -2.464404 |
| 44 | 1 | 0 | 2.754923  | 0.848857  | 1.081143  |
| 45 | 1 | 0 | 1.698317  | 2.212980  | 0.728297  |
| 46 | 1 | 0 | 1.445114  | 1.229456  | 2.190404  |
| 47 | 1 | 0 | -1.485809 | 0.666425  | -2.369159 |
| 48 | 1 | 0 | -2.671295 | -0.642653 | -2.265460 |
| 49 | 1 | 0 | -0.976096 | -1.015674 | -2.146631 |
| 50 | 1 | 0 | 0.906446  | -1.644856 | 2.871472  |
| 51 | 1 | 0 | -2.716550 | 4.100782  | 0.232829  |
| 52 | 1 | 0 | -5.348771 | -3.023739 | -1.552789 |
| 53 | 1 | 0 | -5.978915 | -1.492238 | -2.248622 |
| 54 | 1 | 0 | -6.372007 | -1.923537 | -0.568686 |
